# Supplementary material for: Identification of Candidate Biomarkers Associated with Ovarian Cancer Progression and Prognosis by Integrated Microarray Analysis
Source: Research Square preprint supplement (doi:10.21203/rs.3.rs-441360/v1), 2021-05-07
Supplement: Supplementary file 1 [file 228ede098c4cea2f65f5eb12.docx]

| **Prognostic type** | **Gene** | **LowRisk_NO** | **HighRisk_NO** | **HR(95%CI)** | **LogrankP** |
| --- | --- | --- | --- | --- | --- |
| PFS | CHRDL1 | 359 | 1076 | 1.37 (1.17-1.6) | 7e-05 |
|  | CHGB | 1057 | 378 | 0.74(0.64-0.85) | 3.1e-05 |
|  | IGFBP4 | 729 | 706 | 0.94 (0.83-1.06) | 0.32 |
|  | FBN1 | 970 | 465 | 1.08(0.95-1.24) | 0.24 |
|  | SDC2 | 891 | 544 | 0.8(0.7-0.91) | 0.00064 |
|  | GOLM1 | 358 | 1077 | 1.17(1.01-1.34) | 0.032 |
|  | MAOB | 862 | 573 | 0.83(0.73-0.94) | 0.0045 |
|  | AOX1 | 408 | 1027 | 1.12(0.97-1.29) | 0.12 |
|  | ALDH1A3 | 1068 | 367 | 1.24(1.08-1.43） | 0.0028 |
|  | ADH1B | 1050 | 385 | 1.41(1.22-1.61) | 1.1e-06 |
|  | ADH1C | 385 | 1050 | 1.11(0.96-1.29) | 0.15 |
|  | MAOA | 739 | 696 | 0.86(0.76-0.98） | 6.90E-06 |
| OS | CHRDL1 | 478 | 1178 | 1.19(1.02-1.37） | 0.02 |
|  | CHGB | 1154 | 502 | 0.85(0.74-0.98) | 0.025 |
|  | IGFBP4 | 576 | 1080 | 1.14(0.99-1.3) | 0.068 |
|  | FBN1 | 436 | 219 | 1.62(1.31-2) | 6.2e-06 |
|  | SDC2 | 829 | 827 | 1.09(0.96-1.24) | 0.2 |
|  | GOLM1 | 828 | 828 | 1.14(1-1.29) | 0.049 |
|  | MAOB | 829 | 827 | 0.86(0.76-0.98) | 0.022 |
|  | AOX1 | 829 | 827 | 1.02(0.9-1.16) | 0.72 |
|  | ALDH1A3 | 1146 | 510 | 1.23(1.07-1.41) | 0.0037 |
|  | ADH1B | 772 | 884 | 1.39(1.22-1.58) | 5.9e-07 |
|  | ADH1C | 720 | 936 | 1.18(1.04-1.34) | 0.013 |
|  | MAOA | 670 | 986 | 1.08(0.94-1.23) | 0.28 |

**TableS4 Free progression survival and ovariall survival of two gene clusters from the downregulated DEGs**
